# Supplementary material for: Characterization of KRAS Mutation Subtypes in Non–small Cell Lung Cancer
Source: PubMed Central journal article supplement — Mol Cancer Ther. 2021 Dec 3;20(12):2577–84. doi: 10.1158/1535-7163.MCT-21-0201 (PMC9662933; doi:10.1158/1535-7163.mct-21-0201), 2021-12-03
Supplement: 15357163mct210201-sup-261703_2_supp_7218878_qvfjxs.pdf [file 15357163mct210201-sup-261703_2_supp_7218878_qvfjxs.pdf]

Supplemental Table 4. Key Biomarkers for KRAS mutation subtypes in adenocarcinoma (A) and squamous cell (B) NSCLC histologies.

A.

| Test for Adenocarcinoma NSCLC | G12V |     |       |        | G12A |     |       |        | G12C |      |       |        | G13 |     |       |        | Q61 |     |       |        | G12D |     |       |        | G12 Other |     |       |        | P-value   | Q-value   |
|-------------------------------|------|-----|-------|--------|------|-----|-------|--------|------|------|-------|--------|-----|-----|-------|--------|-----|-----|-------|--------|------|-----|-------|--------|-----------|-----|-------|--------|-----------|-----------|
|                               | +    | -   | Total | %      | +    | -   | Total | %      | +    | -    | Total | %      | +   | -   | Total | %      | +   | -   | Total | %      | +    | -   | Total | %      | +         | -   | Total | %      |           |           |
| TP53                          | 306  | 428 | 734   | 41.70% | 94   | 142 | 236   | 39.80% | 691  | 802  | 1493  | 46.30% | 135 | 129 | 264   | 51.10% | 90  | 160 | 250   | 36.00% | 209  | 320 | 529   | 39.50% | 86        | 80  | 166   | 51.80% | p<0.001*  | 0.006*    |
| STK11                         | 195  | 570 | 765   | 25.50% | 58   | 189 | 247   | 23.50% | 366  | 1172 | 1538  | 23.80% | 100 | 168 | 268   | 37.30% | 72  | 195 | 267   | 27.00% | 87   | 465 | 552   | 15.80% | 52        | 119 | 171   | 30.40% | p<0.0001* | q<0.0001* |
| ATM                           | 66   | 684 | 750   | 8.80%  | 21   | 227 | 248   | 8.50%  | 146  | 1366 | 1512  | 9.70%  | 18  | 250 | 268   | 6.70%  | 25  | 238 | 263   | 9.50%  | 30   | 520 | 550   | 5.50%  | 8         | 161 | 169   | 4.70%  | 0.031*    | 0.246     |
| KEAP1                         | 47   | 720 | 767   | 6.10%  | 14   | 235 | 249   | 5.60%  | 96   | 1451 | 1547  | 6.20%  | 34  | 235 | 269   | 12.60% | 13  | 254 | 267   | 4.90%  | 19   | 538 | 557   | 3.40%  | 10        | 160 | 170   | 5.90%  | p<0.0001* | 0.004*    |
| CDKN2A                        | 66   | 668 | 734   | 9.00%  | 14   | 230 | 244   | 5.70%  | 81   | 1410 | 1491  | 5.40%  | 17  | 244 | 261   | 6.50%  | 16  | 245 | 261   | 6.10%  | 42   | 501 | 543   | 7.70%  | 14        | 152 | 166   | 8.40%  | 0.059     | 0.310     |
| U2AF1                         | 28   | 737 | 765   | 3.70%  | 11   | 237 | 248   | 4.40%  | 45   | 1495 | 1540  | 2.90%  | 10  | 259 | 269   | 3.70%  | 4   | 262 | 266   | 1.50%  | 13   | 540 | 553   | 2.40%  | 13        | 157 | 170   | 7.60%  | 0.011*    | 0.144     |
| BRAF                          | 10   | 747 | 757   | 1.30%  | 4    | 244 | 248   | 1.60%  | 16   | 1515 | 1531  | 1.00%  | 13  | 255 | 268   | 4.90%  | 7   | 258 | 265   | 2.60%  | 5    | 548 | 553   | 0.90%  | 2         | 167 | 169   | 1.20%  | p<0.001*  | 0.006*    |
| NFE2L2                        | 5    | 752 | 757   | 0.70%  | 3    | 243 | 246   | 1.20%  | 14   | 1521 | 1535  | 0.90%  | 2   | 267 | 269   | 0.70%  | 3   | 260 | 263   | 1.10%  | 4    | 545 | 549   | 0.70%  | 3         | 168 | 171   | 1.80%  | 0.857     | 0.963     |
| PTEN                          | 7    | 715 | 722   | 1.00%  | 2    | 237 | 239   | 0.80%  | 12   | 1467 | 1479  | 0.80%  | 0   | 263 | 263   | 0.00%  | 3   | 255 | 258   | 1.20%  | 5    | 529 | 534   | 0.90%  | 2         | 160 | 162   | 1.20%  | 0.803     | 0.963     |
| ERBB2                         | 0    | 766 | 766   | 0.00%  | 0    | 249 | 249   | 0.00%  | 3    | 1545 | 1548  | 0.20%  | 1   | 268 | 269   | 0.40%  | 0   | 267 | 267   | 0.00%  | 1    | 556 | 557   | 0.20%  | 0         | 171 | 171   | 0.00%  | 0.721     | 0.963     |
| RAF1                          | 1    | 749 | 750   | 0.10%  | 1    | 242 | 243   | 0.40%  | 2    | 1508 | 1510  | 0.10%  | 0   | 265 | 265   | 0.00%  | 0   | 262 | 262   | 0.00%  | 0    | 549 | 549   | 0.00%  | 0         | 169 | 169   | 0.00%  | 0.732     | 0.963     |
| AKT1                          | 0    | 761 | 761   | 0.00%  | 1    | 248 | 249   | 0.40%  | 2    | 1539 | 1541  | 0.10%  | 0   | 267 | 267   | 0.00%  | 0   | 264 | 264   | 0.00%  | 2    | 552 | 554   | 0.40%  | 0         | 171 | 171   | 0.00%  | 0.477     | 0.963     |
| EGFR                          | 2    | 763 | 765   | 0.30%  | 2    | 247 | 249   | 0.80%  | 0    | 1545 | 1545  | 0.00%  | 0   | 269 | 269   | 0.00%  | 3   | 264 | 267   | 1.10%  | 2    | 552 | 554   | 0.40%  | 0         | 171 | 171   | 0.00%  | 0.008     | 0.140     |
| POLE                          | 1    | 763 | 764   | 0.10%  | 0    | 249 | 249   | 0.00%  | 0    | 1539 | 1539  | 0.00%  | 0   | 269 | 269   | 0.00%  | 0   | 266 | 266   | 0.00%  | 0    | 555 | 555   | 0.00%  | 1         | 170 | 171   | 0.60%  | 0.070     | 0.340     |

B.

| Test for Squamous NSCLC | G12V |    |       |        | G12A |   |       |        | G12C |    |       |        | G13 |    |       |        | Q61 |   |       |        | G12D |    |       |        | G12 Other |   |       |         | P-value | Q-value |
|-------------------------|------|----|-------|--------|------|---|-------|--------|------|----|-------|--------|-----|----|-------|--------|-----|---|-------|--------|------|----|-------|--------|-----------|---|-------|---------|---------|---------|
|                         | +    | -  | Total | %      | +    | - | Total | %      | +    | -  | Total | %      | +   | -  | Total | %      | +   | - | Total | %      | +    | -  | Total | %      | +         | - | Total | %       |         |         |
| TP53                    | 18   | 3  | 21    | 85.70% | 6    | 2 | 8     | 75.00% | 38   | 26 | 64    | 59.40% | 12  | 2  | 14    | 85.70% | 2   | 3 | 5     | 40.00% | 21   | 8  | 29    | 72.40% | 8         | 0 | 8     | 100.00% | 0.037*  | 0.352   |
| STK11                   | 1    | 20 | 21    | 4.80%  | 3    | 6 | 9     | 33.30% | 8    | 58 | 66    | 12.10% | 5   | 9  | 14    | 35.70% | 0   | 5 | 5     | 0.00%  | 0    | 29 | 29    | 0.00%  | 3         | 5 | 8     | 37.50%  | 0.003*  | 0.061   |
| CDKN2A                  | 4    | 13 | 17    | 23.50% | 3    | 6 | 9     | 33.30% | 6    | 53 | 59    | 10.20% | 5   | 7  | 12    | 41.70% | 0   | 5 | 5     | 0.00%  | 3    | 24 | 27    | 11.10% | 0         | 7 | 7     | 0.00%   | 0.040*  | 0.352   |
| ATM                     | 1    | 19 | 20    | 5.00%  | 0    | 9 | 9     | 0.00%  | 5    | 60 | 65    | 7.70%  | 0   | 13 | 13    | 0.00%  | 0   | 5 | 5     | 0.00%  | 0    | 28 | 28    | 0.00%  | 0         | 8 | 8     | 0.00%   | 0.554   | 0.883   |
| KEAP1                   | 0    | 21 | 21    | 0.00%  | 0    | 9 | 9     | 0.00%  | 4    | 62 | 66    | 6.10%  | 2   | 12 | 14    | 14.30% | 0   | 5 | 5     | 0.00%  | 1    | 28 | 29    | 3.40%  | 0         | 8 | 8     | 0.00%   | 0.485   | 0.836   |
| NFE2L2                  | 0    | 21 | 21    | 0.00%  | 0    | 9 | 9     | 0.00%  | 2    | 62 | 64    | 3.10%  | 1   | 12 | 13    | 7.70%  | 0   | 5 | 5     | 0.00%  | 2    | 26 | 28    | 7.10%  | 0         | 8 | 8     | 0.00%   | 0.748   | 0.980   |
| U2AF1                   | 3    | 18 | 21    | 14.30% | 0    | 9 | 9     | 0.00%  | 2    | 64 | 66    | 3.00%  | 1   | 12 | 13    | 7.70%  | 0   | 5 | 5     | 0.00%  | 0    | 29 | 29    | 0.00%  | 1         | 7 | 8     | 12.50%  | 0.217   | 0.572   |
| BRAF                    | 0    | 21 | 21    | 0.00%  | 1    | 8 | 9     | 11.10% | 0    | 66 | 66    | 0.00%  | 1   | 12 | 13    | 7.70%  | 0   | 5 | 5     | 0.00%  | 0    | 28 | 28    | 0.00%  | 0         | 8 | 8     | 0.00%   | 0.056   | 0.425   |
| PTEN                    | 1    | 20 | 21    | 4.80%  | 0    | 9 | 9     | 0.00%  | 0    | 64 | 64    | 0.00%  | 0   | 13 | 13    | 0.00%  | 0   | 5 | 5     | 0.00%  | 1    | 26 | 27    | 3.70%  | 0         | 8 | 8     | 0.00%   | 0.639   | 0.910   |

+ :presence of corresponding co-mutation

- :absence of corresponding co-mutation

\*: p or q values <0.05
