# Supplementary material for: Characterization of KRAS Mutation Subtypes in Non–small Cell Lung Cancer
Source: PubMed Central journal article supplement — Mol Cancer Ther. 2021 Dec 3;20(12):2577–84. doi: 10.1158/1535-7163.MCT-21-0201 (PMC9662933; doi:10.1158/1535-7163.mct-21-0201), 2021-12-03
Supplement: 15357163mct210201-sup-261703_2_supp_7218879_qvfjxs.pdf [file 15357163mct210201-sup-261703_2_supp_7218879_qvfjxs.pdf]

**Supplemental Table 3. Mutation rates of key biomarkers in KRAS mutated NSCLC cohorts**

| Test   | KRAS WT |       |       |        | G12V |     |       |        | G12A |     |       |        | G12C |      |       |        | G13 |     |       |        | Q61 |     |       |        | G12D |     |       |        | G12 Other |     |       |        | P-value   | Q-value   |
|--------|---------|-------|-------|--------|------|-----|-------|--------|------|-----|-------|--------|------|------|-------|--------|-----|-----|-------|--------|-----|-----|-------|--------|------|-----|-------|--------|-----------|-----|-------|--------|-----------|-----------|
|        | +       | -     | Total | %      | +    | -   | Total | %      | +    | -   | Total | %      | +    | -    | Total | %      | +   | -   | Total | %      | +   | -   | Total | %      | +    | -   | Total | %      | +         | -   | Total | %      |           |           |
| STK11  | 1063    | 11249 | 12312 | 8.60%  | 215  | 697 | 912   | 23.60% | 69   | 226 | 295   | 23.40% | 430  | 1442 | 1872  | 23.00% | 118 | 208 | 326   | 36.20% | 82  | 231 | 313   | 26.20% | 96   | 582 | 678   | 14.20% | 61        | 148 | 209   | 29.20% | p<0.0001* | q<0.0001* |
| GNAS   | 36      | 12287 | 12323 | 0.30%  | 17   | 889 | 906   | 1.90%  | 2    | 294 | 296   | 0.70%  | 8    | 1859 | 1867  | 0.40%  | 2   | 324 | 326   | 0.60%  | 1   | 311 | 312   | 0.30%  | 23   | 660 | 683   | 3.40%  | 1         | 207 | 208   | 0.50%  | p<0.0001* | q<0.0001* |
| BRAF   | 594     | 11710 | 12304 | 4.80%  | 13   | 889 | 902   | 1.40%  | 7    | 289 | 296   | 2.40%  | 19   | 1844 | 1863  | 1.00%  | 17  | 308 | 325   | 5.20%  | 8   | 303 | 311   | 2.60%  | 5    | 671 | 676   | 0.70%  | 3         | 205 | 208   | 1.40%  | p<0.0001* | q<0.0001* |
| KEAP1  | 518     | 11843 | 12361 | 4.20%  | 52   | 862 | 914   | 5.70%  | 18   | 280 | 298   | 6.00%  | 118  | 1763 | 1881  | 6.30%  | 43  | 284 | 327   | 13.10% | 16  | 297 | 313   | 5.10%  | 25   | 659 | 684   | 3.70%  | 12        | 197 | 209   | 5.70%  | p<0.0001* | 0.0001*   |
| NF1    | 943     | 7252  | 8195  | 11.50% | 17   | 580 | 597   | 2.80%  | 7    | 191 | 198   | 3.50%  | 63   | 1176 | 1239  | 5.10%  | 51  | 187 | 238   | 21.40% | 9   | 199 | 208   | 4.30%  | 13   | 433 | 446   | 2.90%  | 6         | 137 | 143   | 4.20%  | p<0.0001* | q<0.0001* |
| TP53   | 8887    | 3192  | 12079 | 73.60% | 404  | 475 | 879   | 46.00% | 122  | 161 | 283   | 43.10% | 888  | 928  | 1816  | 48.90% | 169 | 151 | 320   | 52.80% | 109 | 187 | 296   | 36.80% | 288  | 366 | 654   | 44.00% | 113       | 91  | 204   | 55.40% | p<0.0001* | 0.002*    |
| UZAF1  | 68      | 12245 | 12313 | 0.60%  | 32   | 880 | 912   | 3.50%  | 11   | 286 | 297   | 3.70%  | 53   | 1819 | 1872  | 2.80%  | 11  | 315 | 326   | 3.40%  | 4   | 308 | 312   | 1.30%  | 15   | 664 | 679   | 2.20%  | 16        | 193 | 209   | 7.70%  | 0.002*    | 0.038*    |
| FGFR4  | 0       | 11948 | 11948 | 0.00%  | 0    | 895 | 895   | 0.00%  | 0    | 288 | 288   | 0.00%  | 0    | 1833 | 1833  | 0.00%  | 0   | 317 | 317   | 0.00%  | 0   | 306 | 306   | 0.00%  | 0    | 672 | 672   | 0.00%  | 1         | 203 | 204   | 0.50%  | 0.002*    | 0.038*    |
| VHL    | 16      | 12370 | 12386 | 0.10%  | 0    | 915 | 915   | 0.00%  | 0    | 298 | 298   | 0.00%  | 0    | 1881 | 1881  | 0.00%  | 0   | 327 | 327   | 0.00%  | 0   | 313 | 313   | 0.00%  | 0    | 684 | 684   | 0.00%  | 1         | 209 | 210   | 0.50%  | 0.002*    | 0.038*    |
| ATM    | 282     | 11935 | 12217 | 2.30%  | 70   | 826 | 896   | 7.80%  | 23   | 273 | 296   | 7.80%  | 162  | 1677 | 1839  | 8.80%  | 21  | 304 | 325   | 6.50%  | 29  | 280 | 309   | 9.40%  | 33   | 640 | 673   | 4.90%  | 9         | 199 | 208   | 4.30%  | 0.014*    | 0.205     |
| CDKN2A | 1253    | 10522 | 11775 | 10.60% | 83   | 788 | 871   | 9.50%  | 18   | 268 | 286   | 6.30%  | 107  | 1698 | 1805  | 5.90%  | 27  | 288 | 315   | 8.60%  | 17  | 288 | 305   | 5.60%  | 49   | 615 | 664   | 7.40%  | 17        | 184 | 201   | 8.50%  | 0.025*    | 0.241     |
| EGFR   | 2038    | 10320 | 12358 | 16.50% | 2    | 909 | 911   | 0.20%  | 2    | 296 | 298   | 0.70%  | 1    | 1878 | 1879  | 0.10%  | 0   | 327 | 327   | 0.00%  | 3   | 310 | 313   | 1.00%  | 3    | 678 | 681   | 0.40%  | 0         | 210 | 210   | 0.00%  | 0.026*    | 0.241     |
| POLE   | 3       | 12316 | 12319 | 0.00%  | 1    | 910 | 911   | 0.10%  | 0    | 298 | 298   | 0.00%  | 0    | 1871 | 1871  | 0.00%  | 0   | 327 | 327   | 0.00%  | 0   | 312 | 312   | 0.00%  | 0    | 682 | 682   | 0.00%  | 1         | 209 | 210   | 0.50%  | 0.074     | 0.381     |
| AKT1   | 41      | 12296 | 12337 | 0.30%  | 0    | 908 | 908   | 0.00%  | 1    | 296 | 297   | 0.30%  | 3    | 1871 | 1874  | 0.20%  | 0   | 325 | 325   | 0.00%  | 1   | 309 | 310   | 0.30%  | 2    | 679 | 681   | 0.30%  | 0         | 210 | 210   | 0.00%  | 0.627     | 0.97      |
| RAF1   | 17      | 12044 | 12061 | 0.10%  | 1    | 895 | 896   | 0.10%  | 1    | 290 | 291   | 0.30%  | 2    | 1834 | 1836  | 0.10%  | 0   | 321 | 321   | 0.00%  | 0   | 308 | 308   | 0.00%  | 0    | 670 | 670   | 0.00%  | 0         | 208 | 208   | 0.00%  | 0.727     | 0.97      |
| ERBB2  | 256     | 12126 | 12382 | 2.10%  | 0    | 913 | 913   | 0.00%  | 0    | 298 | 298   | 0.00%  | 3    | 1879 | 1882  | 0.20%  | 1   | 326 | 327   | 0.30%  | 0   | 313 | 313   | 0.00%  | 1    | 683 | 684   | 0.10%  | 0         | 210 | 210   | 0.00%  | 0.729     | 0.97      |
| PTEN   | 565     | 10971 | 11536 | 4.90%  | 10   | 856 | 866   | 1.20%  | 3    | 283 | 286   | 1.00%  | 16   | 1781 | 1797  | 0.90%  | 0   | 315 | 315   | 0.00%  | 3   | 299 | 302   | 1.00%  | 6    | 648 | 654   | 0.90%  | 2         | 198 | 200   | 1.00%  | 0.731     | 0.97      |
| NFE2L2 | 543     | 11739 | 12282 | 4.40%  | 5    | 899 | 904   | 0.60%  | 3    | 292 | 295   | 1.00%  | 17   | 1844 | 1861  | 0.90%  | 3   | 323 | 326   | 0.90%  | 4   | 305 | 309   | 1.30%  | 6    | 666 | 672   | 0.90%  | 3         | 207 | 210   | 1.40%  | 0.871     | 0.97      |

\*: p or q values <0.05
