# Supplementary material for: Characterization of KRAS Mutation Subtypes in Non–small Cell Lung Cancer
Source: PubMed Central journal article supplement — Mol Cancer Ther. 2021 Dec 3;20(12):2577–84. doi: 10.1158/1535-7163.MCT-21-0201 (PMC9662933; doi:10.1158/1535-7163.mct-21-0201), 2021-12-03
Supplement: 15357163mct210201-sup-261703_2_supp_7218880_qvfjxs.pdf [file 15357163mct210201-sup-261703_2_supp_7218880_qvfjxs.pdf]

**Supplemental Table 2. Immune checkpoint therapy associated markers among *KRAS*-mutated tumors (A), comparison of these markers between *KRAS* G12C and all other subtypes (B) and further comparison between G12C, G12A and G13D subtypes (C). \* represents p or q values <0.05.**

A.

| Test            | KRAS WT % | G12V % | G12A % | G12C % | G13 % | Q61 % | G12D % | G12 Other % | P-value   | Q-value   |
|-----------------|-----------|--------|--------|--------|-------|-------|--------|-------------|-----------|-----------|
| TMB-H           | 30.1%     | 34.7%  | 27.3%  | 36.4%  | 50.0% | 28.2% | 19.1%  | 43.7%       | p<0.0001* | q<0.0001* |
| MSI-H/dMMR      | 0.7%      | 0.6%   | 0.7%   | 0.4%   | 0.6%  | 1.6%  | 0.3%   | 0.5%        | 0.251     | 0.766     |
| PD-L1 TPS ≥1%   | 52.1%     | 58.2%  | 61.5%  | 65.5%  | 57.7% | 62.6% | 62.7%  | 56.4%       | 0.004*    | 0.06      |
| PD-L1 TPS ≥ 50% | 25.9%     | 35.2%  | 36.3%  | 41.3%  | 35.0% | 36.7% | 35.3%  | 28.2%       | 0.002*    | 0.038*    |

B.

| Test           | G12C Positive | G12C Negative | Total | % G12C mt | non G12C Positive | non G12C Negative | Total | % non G12C mt | P-value   | Q-value   |
|----------------|---------------|---------------|-------|-----------|-------------------|-------------------|-------|---------------|-----------|-----------|
| TMB-H          | 408           | 712           | 1120  | 36.4%     | 518               | 1115              | 1633  | 31.7%         | 0.010219* | 0.012774* |
| MSI-H/dMMR     | 8             | 1833          | 1841  | 0.4%      | 17                | 2663              | 2680  | 0.6%          | 0.373472  | 0.373472  |
| PD-L1 TPS ≥1%  | 1118          | 588           | 1706  | 65.5%     | 1493              | 996               | 2489  | 60.0%         | 0.000271* | 0.000451* |
| PD-L1 TPS ≥50% | 704           | 1002          | 1706  | 41.3%     | 870               | 1619              | 2489  | 35.0%         | 3.36E-05* | 8.66E-05* |

C.

| Test          | G12A % | G12C % | P value (G12A vs G12C) | Q value (G12A vs G12C) | G13D % | P value (G12A/G12C/G13D) | Q value (G12A/G12C/G13D) |
|---------------|--------|--------|------------------------|------------------------|--------|--------------------------|--------------------------|
| TMB-H         | 27.27% | 36.43% | 0.018*                 | 0.272                  | 46.27% | 0.011*                   | 0.274                    |
| MSI-H/dMMR    | 0.70%  | 0.40%  | 0.555                  | 0.788                  | 1.70%  | 0.172                    | 0.805                    |
| PD-L1 TPS ≥1% | 61.50% | 65.50% | 0.197                  | 0.787                  | 65.70% | 0.43                     | 0.912                    |
