# Supplementary material for: Characterization of KRAS Mutation Subtypes in Non–small Cell Lung Cancer
Source: PubMed Central journal article supplement — Mol Cancer Ther. 2021 Dec 3;20(12):2577–84. doi: 10.1158/1535-7163.MCT-21-0201 (PMC9662933; doi:10.1158/1535-7163.mct-21-0201), 2021-12-03
Supplement: 15357163mct210201-sup-261703_2_supp_7218881_qvfjxs.pdf [file 15357163mct210201-sup-261703_2_supp_7218881_qvfjxs.pdf]

**Supplemental Table 1. Frequency of KRAS mutation subtypes in never smokers/ light smokers (<15 packs/year) and current smokers**

| <b>KRAS Category</b> | <b>Never Smoker/Light Smoker<br/>(&lt;15 packs/year) N[%]</b> | <b>Current Smoker N[%]</b> | <b>Total</b> |
|----------------------|---------------------------------------------------------------|----------------------------|--------------|
| <b>G12C</b>          | 492[40.49]                                                    | 209[42.92]                 | <b>701</b>   |
| <b>G12V</b>          | 225[18.5]                                                     | 100[20.53]                 | <b>325</b>   |
| <b>G12D</b>          | 195[16.0]                                                     | 41[8.42]                   | <b>236</b>   |
| <b>G13</b>           | 73[6.0]                                                       | 54[11.09]                  | <b>127</b>   |
| <b>Q61</b>           | 81[6.7]                                                       | 31[6.37]                   | <b>112</b>   |
| <b>G12A</b>          | 68[5.6]                                                       | 32[6.57]                   | <b>100</b>   |
| <b>G12 Other</b>     | 55[4.5]                                                       | 16[3.29]                   | <b>71</b>    |
| <b>Other</b>         | 26[2.1]                                                       | 4[0.82]                    | <b>30</b>    |
| <b>Total</b>         | <b>1215</b>                                                   | <b>487</b>                 | <b>1702</b>  |
