# Supplementary material for: Characterization of KRAS Mutation Subtypes in Non–small Cell Lung Cancer
Source: PubMed Central journal article supplement — Mol Cancer Ther. 2021 Dec 3;20(12):2577–84. doi: 10.1158/1535-7163.MCT-21-0201 (PMC9662933; doi:10.1158/1535-7163.mct-21-0201), 2021-12-03

**Supplemental Figure 1. Key Biomarkers for *KRAS* mutation subtypes in adenocarcinoma and squamous cell NSCLC histologies.** Frequency of the 10 most common co-occurring mutations including *TP53*, *STK11*, *ATM*, *KEAP1*, *CDKN2A*, *U2AF1*, *BRAF*, *NFE2L2*, *RAF1* and *EGFR* are displayed for each *KRAS* mutation subtype in adenocarcinoma and squamous cell NSCLC cohorts.

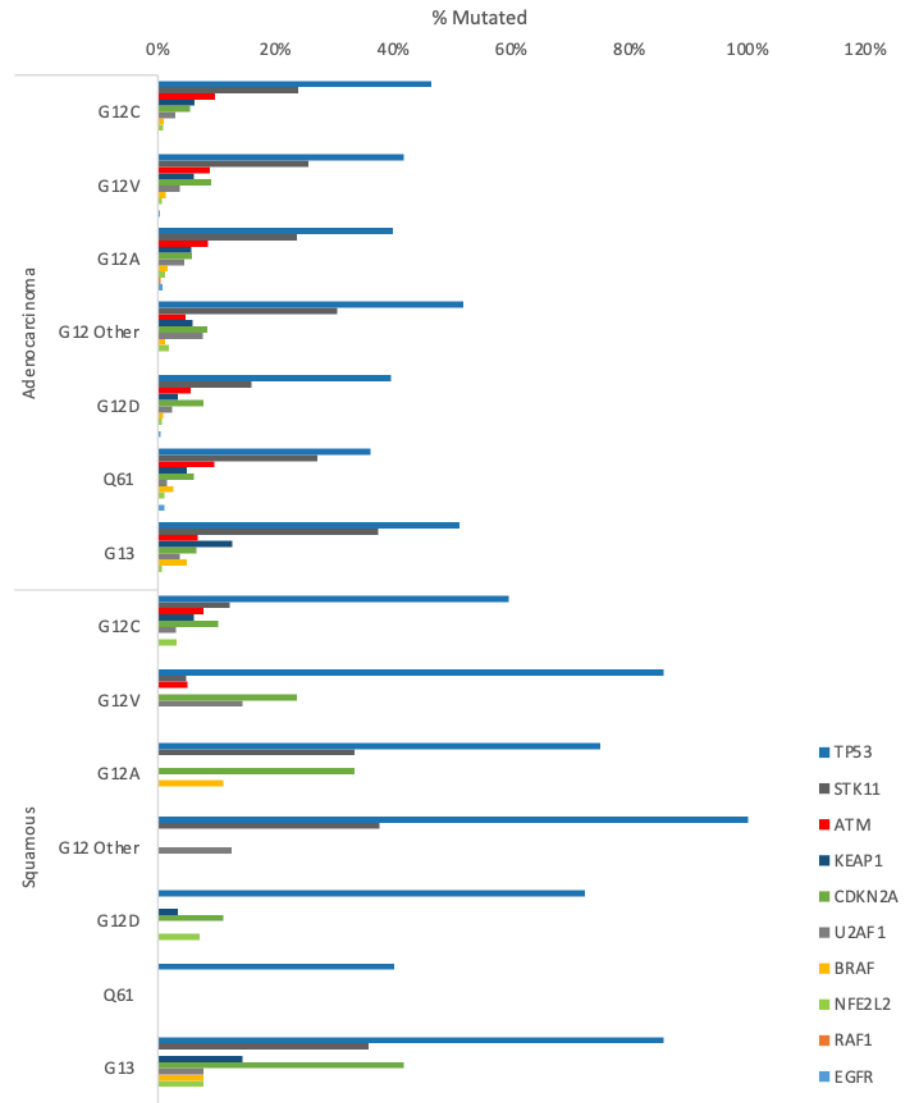

Supplement: 15357163mct210201-sup-261703_2_supp_7218882_qvfjxs.pdf [file 15357163mct210201-sup-261703_2_supp_7218882_qvfjxs.pdf]
