# Supplementary material for: Characterization of KRAS Mutation Subtypes in Non–small Cell Lung Cancer
Source: PubMed Central journal article supplement — Mol Cancer Ther. 2021 Dec 3;20(12):2577–84. doi: 10.1158/1535-7163.MCT-21-0201 (PMC9662933; doi:10.1158/1535-7163.mct-21-0201), 2021-12-03
Supplement: 15357163mct210201-sup-261703_2_supp_7218883_qvfjxs.pdf [file 15357163mct210201-sup-261703_2_supp_7218883_qvfjxs.pdf]

A.

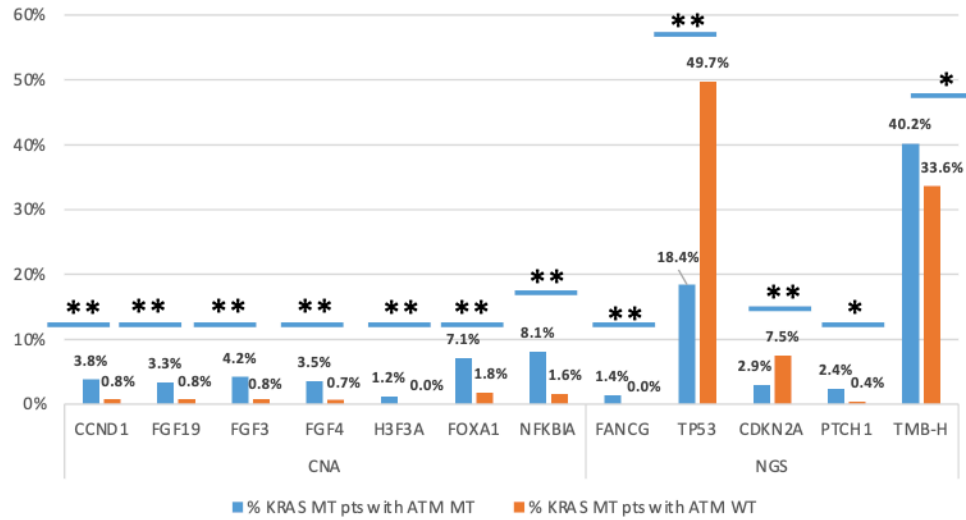

**Supplemental Figure 2 . Differences in co-mutations and immune markers between patients with KRAS mutated (KRAS MT) NSCLC with or without an ATM mutation (ATM MT; A) and between patients with KRAS mutated (KRAS MT) NSCLC with or without a U2AF1 co-mutation (U2AF1 MT; B). (A) Frequency of the 10 most common co-occurring mutations as well as TMB high in patients with tumors harboring KRAS mutations with or without an ATM mutation. (B) Frequency of the 10 most common co-occurring mutation in patients with tumors harboring both KRAS mutations with or without U2AF1 mutations.**

B.

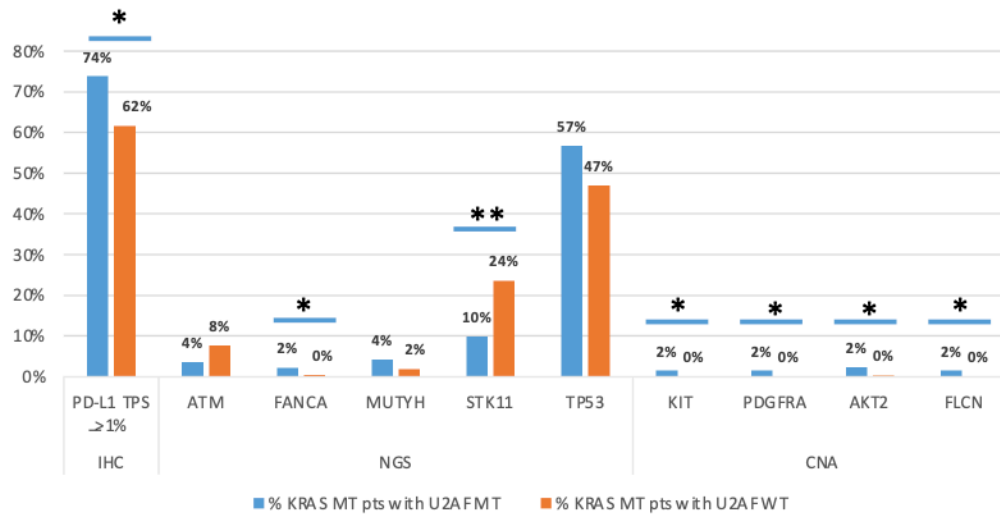

\*\*q<0.05  
\* p<0.05
